# Supplementary material
Source: Royal Society of Chemistry journal article supplement (doi:10.1039/d6nr01137c)
Supplement: d6nr01137c1.pdf [file d6nr01137c1.pdf]

## **Electronic Supplementary Material (ESI†)**

### **Band Gap-Engineered Phenanthrenequinone-Based Donor– Acceptor Conjugated Microporous Polymers for Ultrafast Photocatalytic Removal of Tetracycline**

Soumitra Sau<sup>#</sup>, Suman Karmakar<sup>#</sup> and Suman Kalyan Samanta\*

Department of Chemistry, Indian Institute of Technology Kharagpur, Kharagpur 721302,  
India. E-mail: [sksamanta@chem.iitkgp.ac.in](mailto:sksamanta@chem.iitkgp.ac.in)

## 1. Experimental Section

**1.1. Materials and Methods.** All the chemicals and reagents were purchased from commercial sources and used directly as raw materials without further treatment. Thin-layer chromatography (TLC) on silica gel GF<sub>254</sub> was used for the determination of R<sub>f</sub> values, and the visualization was performed by irradiation with a UV lamp at 254 nm. Column chromatography was performed on Merck silica gel (100-200 mesh) with eluent as mentioned. <sup>1</sup>H (500 MHz) and <sup>13</sup>C (125 MHz) NMR spectra were recorded in a Bruker Avance-500 NMR spectrometer in deuterated solvent at ambient temperature (300 K). Chemical shifts are reported in ppm ( $\delta$ ) relative to tetramethylsilane (TMS) as the internal standard (CDCl<sub>3</sub>  $\delta$  7.26 ppm for <sup>1</sup>H and 77.0 ppm for <sup>13</sup>C). Solid-state <sup>13</sup>C CPMAS NMR spectra were recorded in a Bruker Ultrashield-500 NMR spectrometer. Fourier transform Infrared spectra (FTIR, 4000-600 cm<sup>-1</sup>) were performed on a Nicolet 6700 FT-IR spectrometer (Thermo Fischer) Instrument, and the wave numbers of the recorded IR signals are reported in cm<sup>-1</sup>. Thermogravimetric analyses (TGA) were performed on a Pyris Diamond TG DTA (PerkinElmer) instrument. The as-synthesised D-A CMPs were observed under a scanning electron microscope (SEM) model ZEISS SUPRA 40. The samples were prepared on gold stubs by adding powder polymers and mounting them on top of double-sided tape. UV-Vis-NIR diffuse reflection spectrum (DRS) was acquired with a UV-Vis-NIR spectrophotometer (Cary 5000, Agilent). X-ray diffraction patterns of the powder organic polymer samples were obtained using a Bruker AXS D-8Advanced SWAX diffractometer using Cu-K $\alpha$  (0.15406 nm) radiation. The N<sub>2</sub> adsorption/desorption isotherms of the sample were recorded on a Micromeritics 3-Flex Surface Characterization Analyzer at 77 K. The information related to the excited-state lifetime of CMPs has been obtained from the TCSPC setup from DeltaFlex TCSPC (HORIBA) in reverse mode. UV-visible absorption spectra were recorded on a Shimadzu UV-2550 UV-Vis spectrophotometer. The specific measurement details regarding reactive oxygen species (ROS) trapping are as follows: In 3 mL air-saturated CH<sub>3</sub>CN, 5 mg photocatalyst and 5 mg of N,N,N',N'-tetramethylphenylenediamine (NTPD) were added. Then O<sub>2</sub> was purged into that mixture, and the whole mixture was stirred under white light irradiation (100 W white LED) for 2 h. Then, the polymer was filtered out, and the filtrate portion was submitted for UV analysis. A Bruker ELEXSYS 580 spectrometer was used to record the EPR spectra. The specific measurement details regarding reactive oxygen species (ROS) trapping are as follows: the modulation frequency = 100.00 kHz, modulation amplitude = 5.000 G. The samples were prepared by adding 1 mg of photocatalyst to a 1 mL 0.1 M air-saturated methanol solution of 5,5-dimethyl-1-pyrrolineN-oxide (DMPO).

## 1.2. Electrochemical measurements

Cyclic voltammetry (CV) measurement was carried out by using a CH instrument with a three electrode-cell [CMPs-coated glassy carbon electrode as a working electrode, platinum wire as a counter electrode, and Ag/Ag<sup>+</sup> in acetonitrile (+0.49 V vs NHE)<sup>1</sup> as a reference electrode. A scan rate of 0.1 V/s was used. A solution of 0.1 (M) tetrabutylammonium hexafluorophosphate in acetonitrile was used as the supporting electrolyte. 2 mg of well-dried POPs was well

dispersed in a binder solution of 25 wt% of polyvinylidene fluoride (PVDF) and 500  $\mu\text{L}$  of ethanol through ultrasonication for 1 h to obtain a stable suspension. Then, the pre-polished glassy carbon electrode was coated with 20  $\mu\text{L}$  of the prepared polymeric dispersion. The electrode was dried for 1 day at room temperature, and then prior to the CV experiment. The electrode potential values are given with respect to  $E_{\text{Ag}/\text{AgCl}} = 0.197$  vs NHE.<sup>2</sup> The LUMO energy levels of the POPs were determined by using the empirical equations,  $E_{\text{LUMO}} = (E_{\text{onset/red}} + 0.49 - 0.197)\text{V}$  (vs Ag/AgCl).<sup>3,4</sup> EIS was determined over the frequency range of  $10^2$ – $10^6$  Hz with an ac amplitude of 10 mV at the open circuit voltage under room-light illumination by using 0.5 M  $\text{Na}_2\text{SO}_4$  aqueous solution as supporting electrolyte.

### 1.3. Photocurrent measurements

Photoelectrochemical measurements were conducted in a three-electrode system using a CH instrument under a 20 W white LED. The working electrodes are prepared as follows: 2 mg of well-dried CMPs is separately ground with 0.5 mg of polyvinylidene fluoride (PVDF) and 50  $\mu\text{L}$  of ethanol to make a slurry. The slurry is then coated onto FTO glass electrodes with an active area of  $1\text{ cm}^2$ , and these electrodes were dried at  $80\text{ }^\circ\text{C}$  for 1 h to evaporate the solvent. An aqueous solution of 0.5 M  $\text{Na}_2\text{SO}_4$  was used as the supporting electrolyte. The photocurrent intensity of the as-prepared electrodes was measured at 0.3 V versus s-Ag/AgCl with the light on and off.

## Synthetic Procedure

### Synthesis of D-A CMP, TRZ-PHQ:

In a 100 mL two-necked round-bottom flask, 300 mg (0.436 mmol) of monomer **1**, 240 mg (0.655 mmol) of 2,7-dibromophenanthrene-9,10-dione, 25 mg (5 mol%) of  $\text{Pd}(\text{PPh}_3)_4$ , and 963.8 mg (6.984 mmol) of  $\text{K}_2\text{CO}_3$  were added under an argon atmosphere. A degassed mixture of 9 mL toluene and 3 mL water was injected into the reaction mixture, which was then purged with argon for 40 minutes. The reaction mixture was stirred vigorously at  $95\text{ }^\circ\text{C}$  for 5 days. The resulting precipitate was collected by filtration and thoroughly washed with water, methanol, and chloroform. Further purification was carried out by washing the precipitate with methanol, acetone, and chloroform in a Soxhlet apparatus. Finally, the polymer was dried under vacuum, yielding a reddish-brown product (238 mg) with an 89 % yield. Characterization data: FT-IR ( $\text{cm}^{-1}$ ): 1672, 1572, 1501;  $^{13}\text{C}$  CPMA NMR (ppm):  $\sim 180$ ,  $\sim 171$ ,  $\sim 140$ ,  $\sim 135$ – $127$ ; TGA: 5% weight loss at  $330\text{ }^\circ\text{C}$ .

## 2. Characterizations

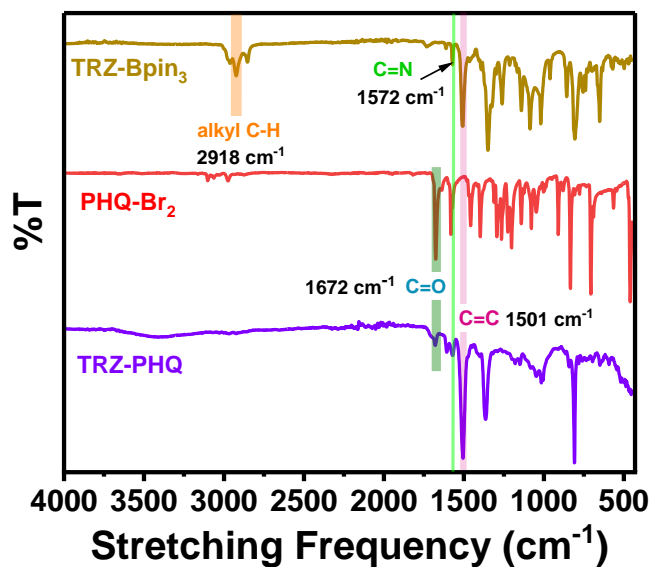

**Figure S1.** FT-IR spectra of monomer PHQ-Br<sub>2</sub> (red), monomer TRZ-Bpin<sub>3</sub> (yellow), and polymer TRZ-PHQ (blue)

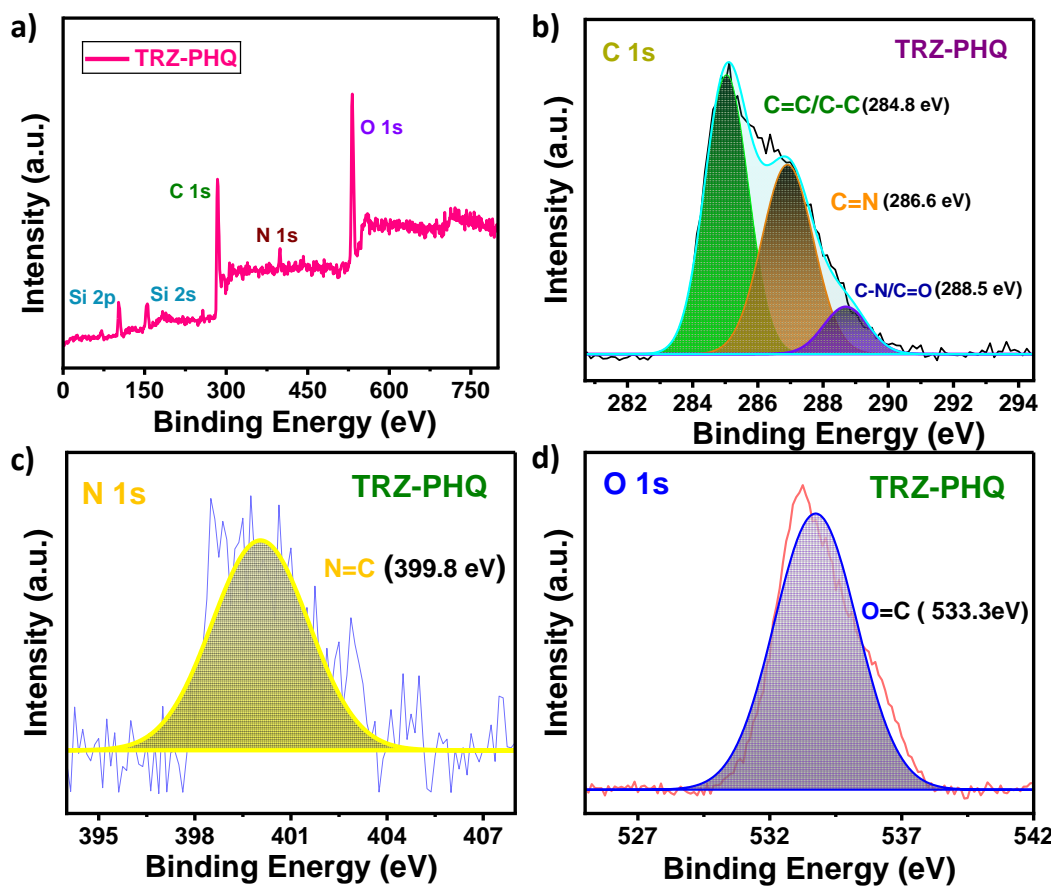

**Figure S2.** a) Full-range XPS spectrum of TRZ-PHQ; high-resolution deconvoluted XPS spectra of b) C 1s, c) N 1s, and d) O 1s for TRZ-PHQ

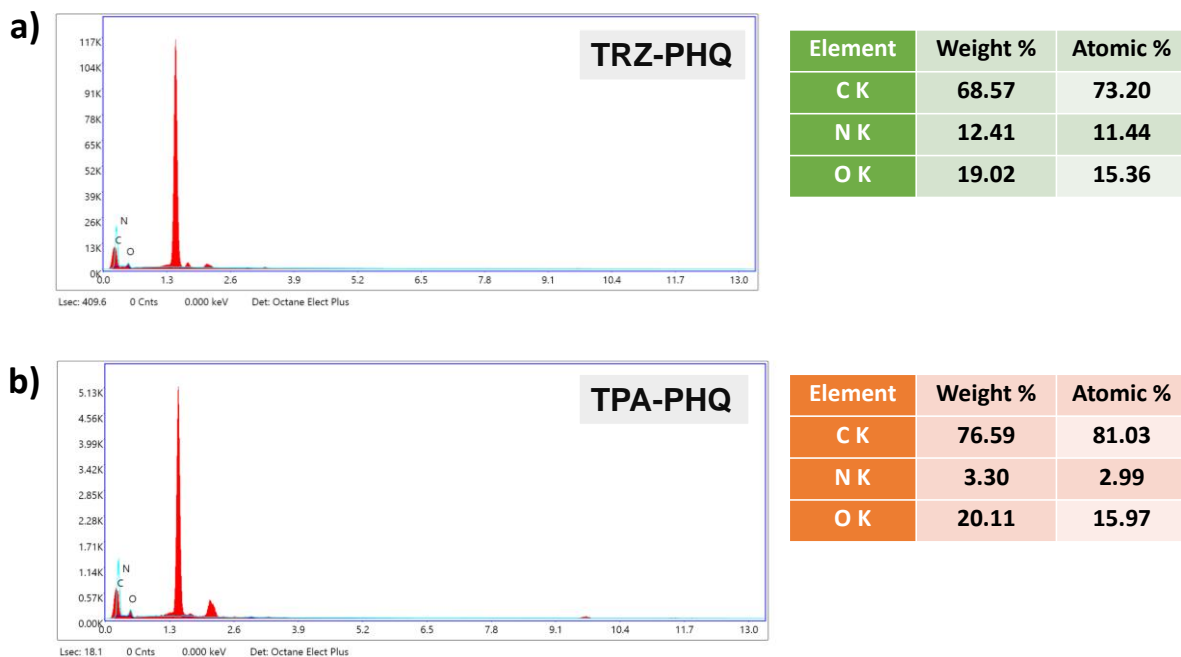

**Figure S3.** Energy dispersive X-ray (EDX) analysis of a) **TRZ-PHQ** and b) **TPA-PHQ**; inset: tabular representation of different elements in atomic % and weight % present in the polymer.

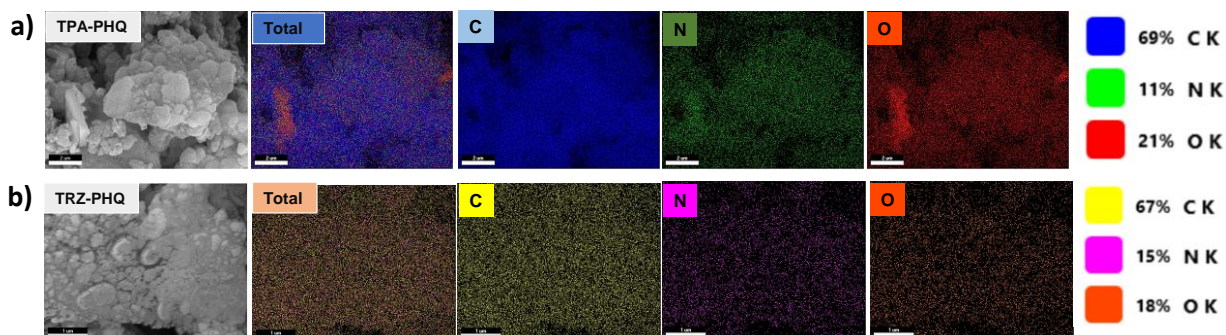

**Figure S4.** Elemental mapping analysis of a) **TPA-PHQ** and b) **TRZ-PHQ**.

**Table S1.** BET surface area, pore volume, and average pore diameter of the CMPs.

| CMPs           | BET Surface area     | BJH Adsorption cumulative volume of pores | BJH Adsorption average pore diameter |
|----------------|----------------------|-------------------------------------------|--------------------------------------|
| <b>TRZ-PHQ</b> | 42 m <sup>2</sup> /g | 0.047 cm <sup>3</sup> /g                  | 1.78 nm                              |
| <b>TPA-PHQ</b> | 35 m <sup>2</sup> /g | 0.037 cm <sup>3</sup> /g                  | 2.02 nm                              |

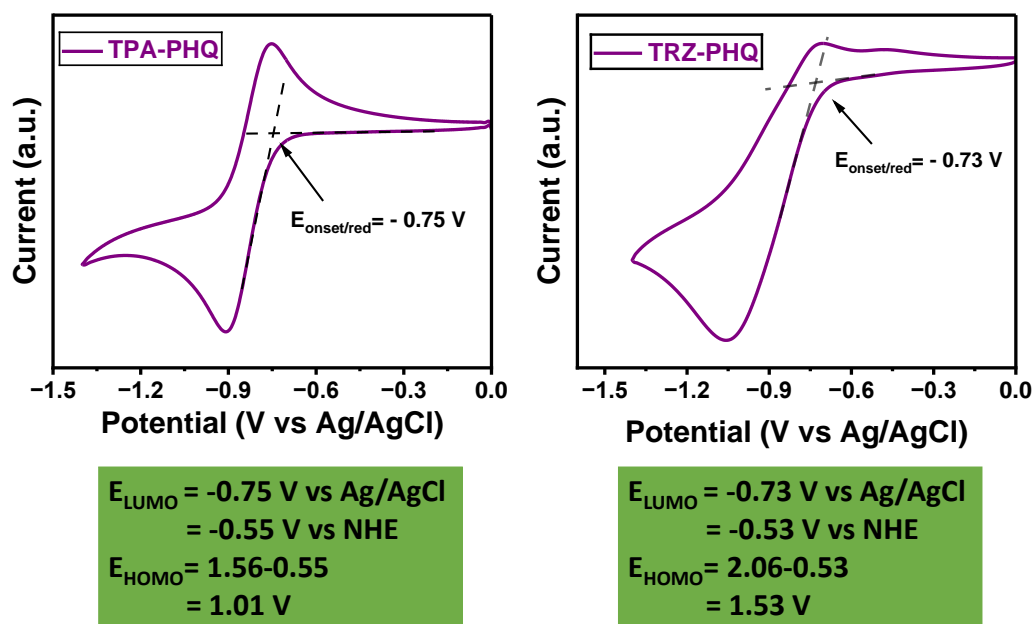

Figure S5. CV plots of TPA-PHQ and TRZ-PHQ.

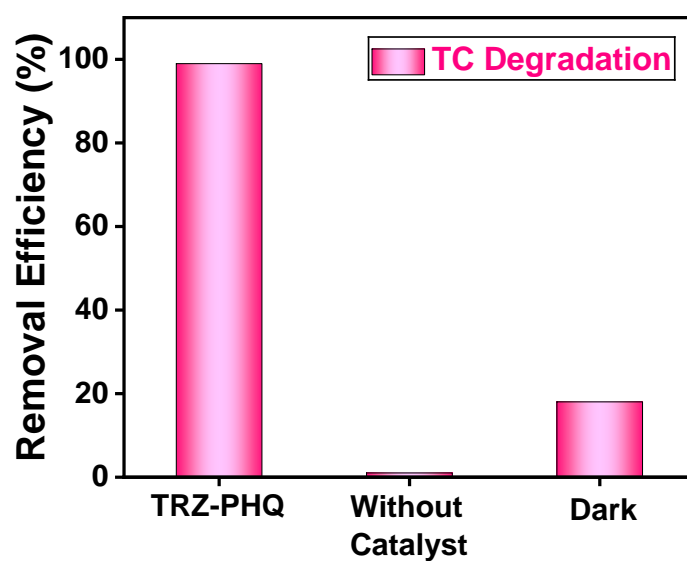

Figure S6. Control tests for photocatalytic degradation of Tetracycline(TC) by TRZ-PHQ.

### 3. Photocatalytic Application

#### 3.1. Photocatalytic degradation of tetracycline

**Table S2.** Comparison of photocatalytic degradation efficiencies of tetracycline for various photocatalysts.

| Catalyst                     | Light source                   | Initial conc. TC (mg/L) | Photocatalyst loading (mg)/concentration (g/L) | Solution volume (mL) | pH  | Degradation rate (%) | Time    | Kinetic constants        | Ref.      |
|------------------------------|--------------------------------|-------------------------|------------------------------------------------|----------------------|-----|----------------------|---------|--------------------------|-----------|
| TRZ-PHQ                      | 100 W ( $\lambda > 420$ nm)    | 20                      | 5 / (0.5)                                      | 10                   | 6.5 | 99%                  | 15 min  | 0.1924 min <sup>-1</sup> | This work |
| N-COF/BOB                    | 300 W ( $\lambda > 420$ nm)    | 60                      | 5 / (0.1)                                      | 50                   | 7   | 81.2%                | 120 min | 0.0137 min <sup>-1</sup> | 5         |
| Tz-CMP-3                     | 300 W ( $\lambda > 420$ nm)    | 15                      | 20 / (0.2)                                     | 100                  | 7   | 95.6%                | 30 min  | 0.1122 min <sup>-1</sup> | 6         |
| Sp <sup>2</sup> c-COF        | 300 W ( $\lambda < 400$ nm)    | 20                      | 20 / (0.2)                                     | 100                  | 4.2 | 73.5%                | 90 min  | 0.0387 min <sup>-1</sup> | 7         |
| ATBT-POP                     | 300 W ( $\lambda > 420$ nm)    | 10                      | 30 / (0.6)                                     | 50                   | --- | 92.12%               | 120 min | 0.0471 min <sup>-1</sup> | 8         |
| ID-PIP                       | 300 W ( $\lambda > 420$ nm)    | 20                      | 15 / (0.15)                                    | 100                  | 7   | 96 %                 | 30 min  | 0.0545 min <sup>-1</sup> | 9         |
| BMTA-TAPT                    | 300 W ( $\lambda > 420$ nm)    | 10                      | 50 / (0.5)                                     | 100                  | 7   | 93.6 %               | 45 min  | 0.079 min <sup>-1</sup>  | 10        |
| 0.5 CCM3                     | 350 W ( $\lambda > 420$ nm)    | 20                      | 30 / (0.6)                                     | 50                   | --- | 88.4 %               | 90 min  | 0.0231 min <sup>-1</sup> | 11        |
| MSTO5                        | 250 W ( $\lambda > 420$ nm)    | 10                      | 100 / (1)                                      | 100                  | --- | 66.7%                | 60 min  | 0.0166 min <sup>-1</sup> | 12        |
| CMP-HS-S/TiO <sub>2</sub> -2 | 500 W ( $\lambda > 420$ nm)    | 10                      | 10 / (0.33)                                    | 30                   | --- | 90 %                 | 180 min | 0.011 min <sup>-1</sup>  | 13        |
| CNBTC-50                     | 250 W ( $\lambda > 420$ nm)    | 10                      | 25 / (0.5)                                     | 50                   | 7.4 | 91.6 %               | 60 min  | 0.0388 min <sup>-1</sup> | 14        |
| 3D-PDI                       | 5 W ( $\lambda > 420$ nm)      | 20                      | 25 / (0.5)                                     | 50                   | 5   | 80%                  | 150 min | 0.0073 min <sup>-1</sup> | 15        |
| EdtTz-CMP                    | 300 W ( $\lambda > 420$ nm)    | 15                      | 20 / (0.2)                                     | 100                  | 7   | 94.6%                | 90 min  | 0.0405 min <sup>-1</sup> | 16        |
| Sol-10BP/BiOBr               | 300 W (420< $\lambda$ >780 nm) | 50                      | 100 / (1)                                      | 100                  | --- | 85 %                 | 90 min  | 0.021 min <sup>-1</sup>  | 17        |
| 3BCN                         | 500 W ( $\lambda > 420$ nm)    | 5                       | 20 / (0.2)                                     | 100                  | 7   | 88.6 %               | 120 min | 0.0222 min <sup>-1</sup> | 18        |

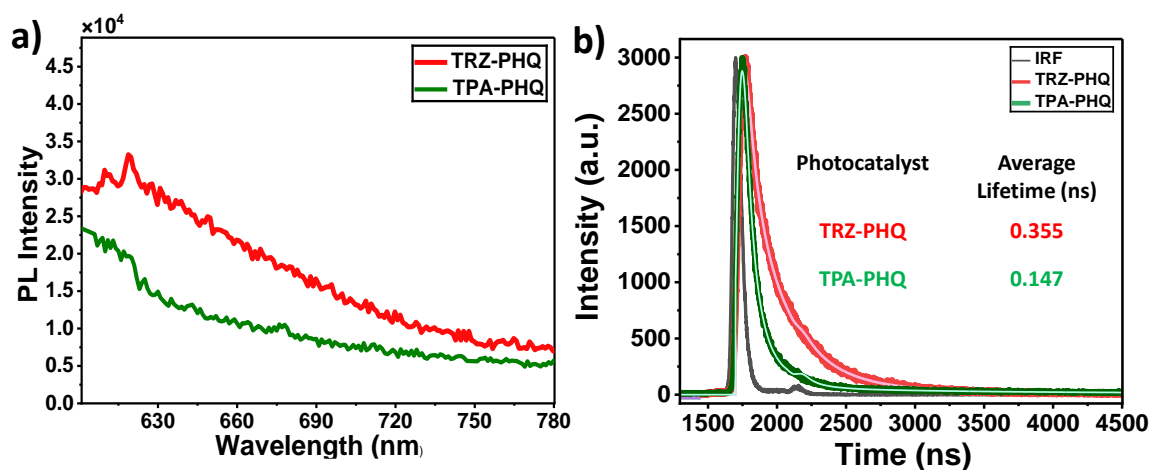

**Figure S7.** a) PL spectra of the as-prepared CMPs, recorded at excitation wavelengths of 470 nm for **TRZ-PHQ** and 570 nm for **TPA-PHQ**. b) TRPL decay profiles of the corresponding CMPs.

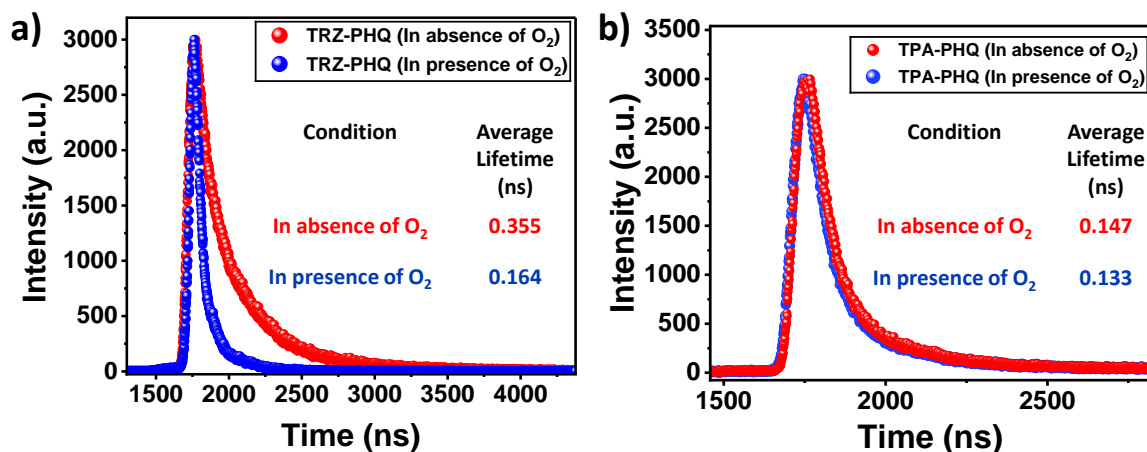

**Figure S8.** TRPL decay profiles of a) **TRZ-PHQ** and b) **TPA-PHQ** measured in the presence and absence of oxygen.

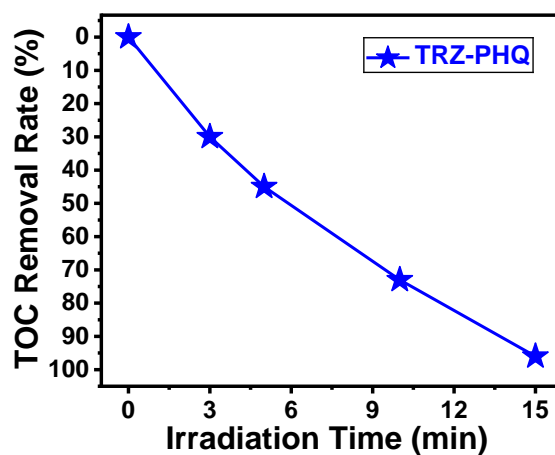

**Figure S9.** TOC analysis of TC degradation over **TRZ-PHQ** under visible light irradiation.

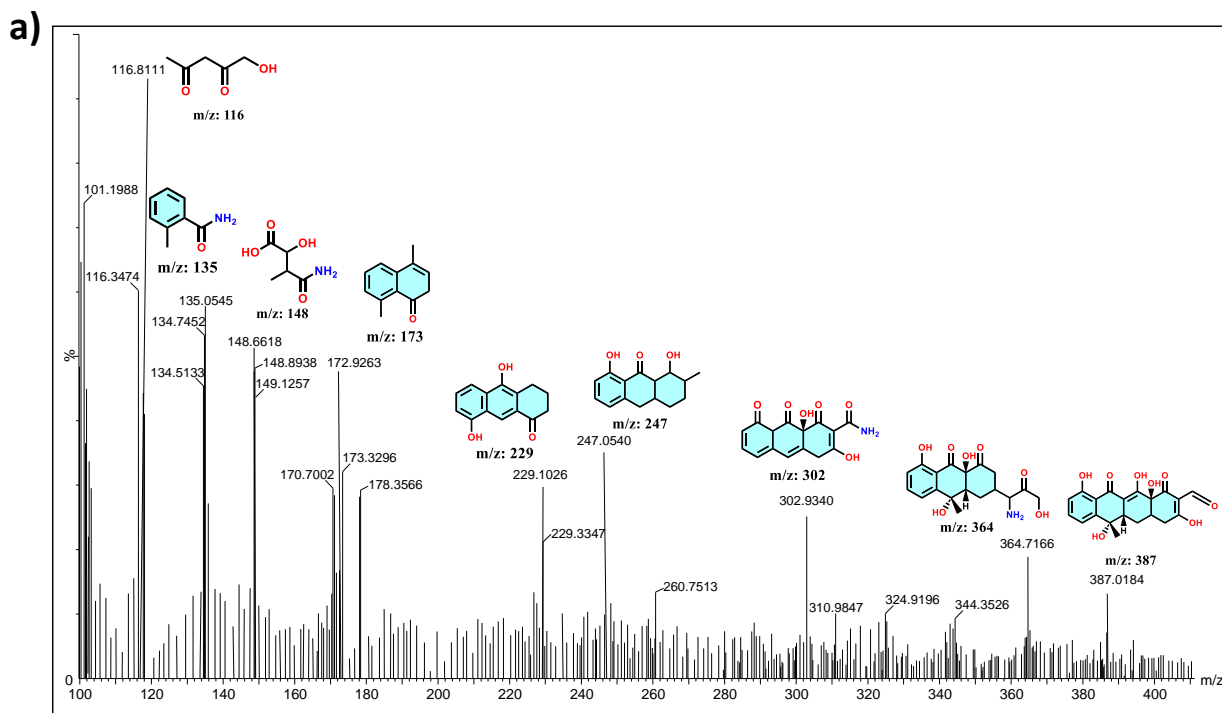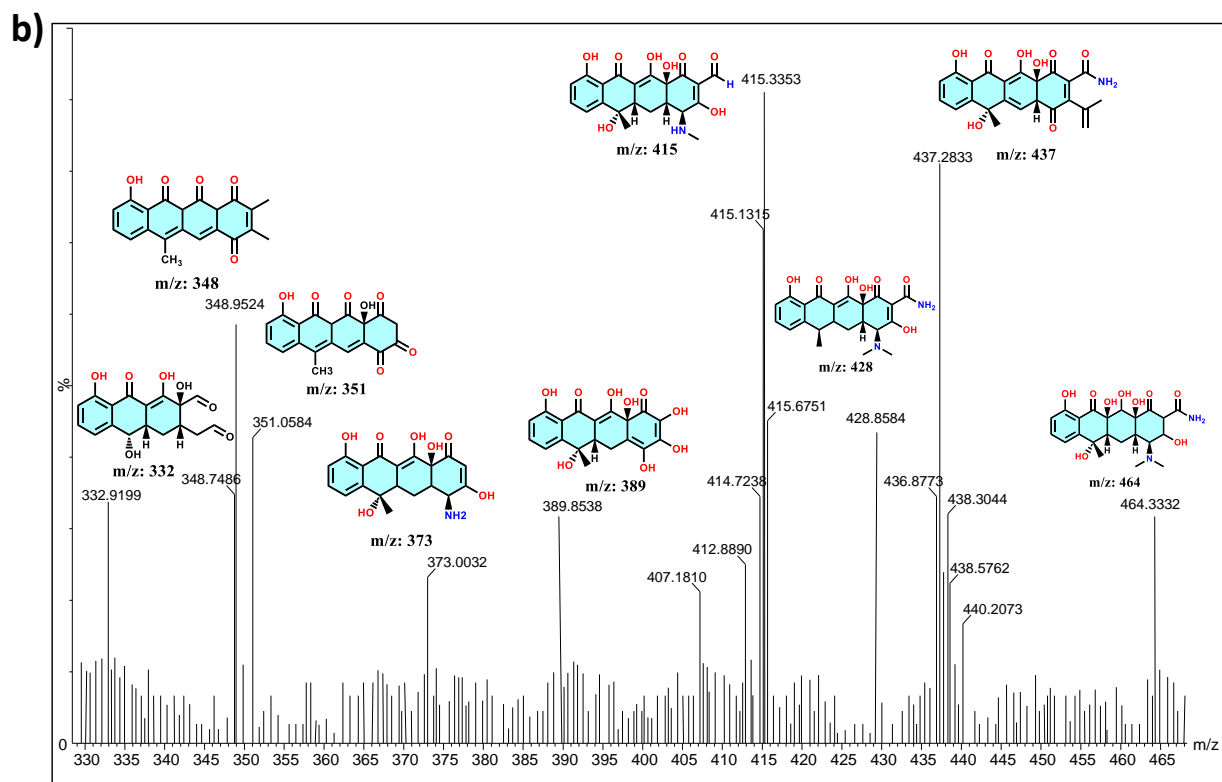

**Figure S10.** a) and b) LC-MS spectra of tetracycline solutions after photocatalysis by **TRZ-PHQ**.

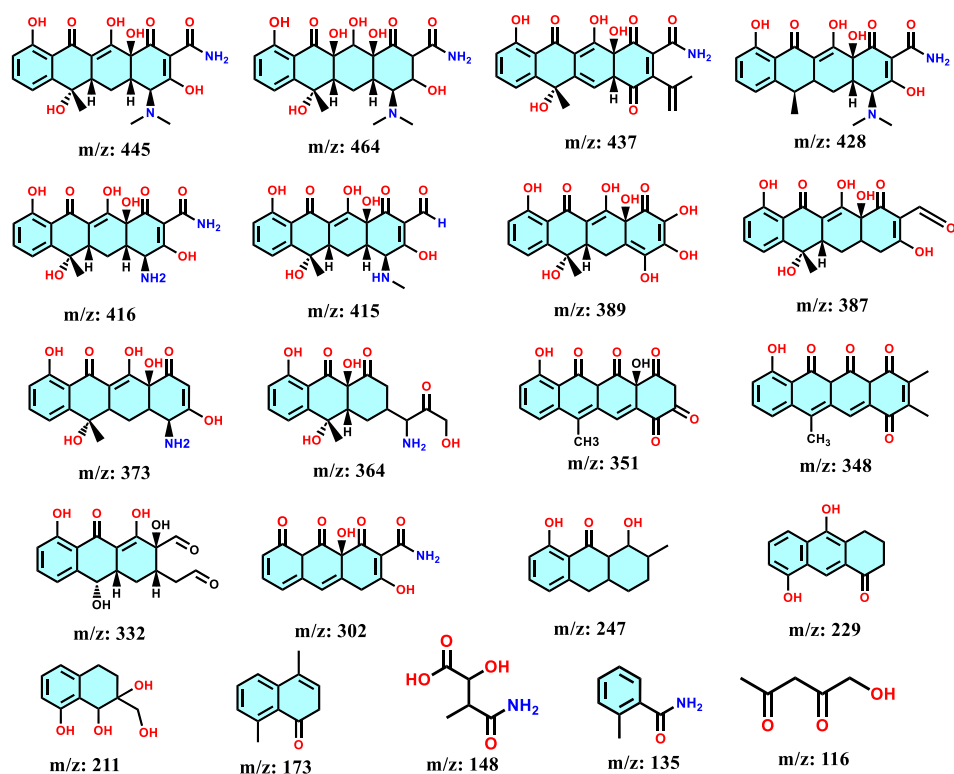

**Figure S11.** Reaction intermediates for tetracycline degradation with **TRZ-PHQ**.

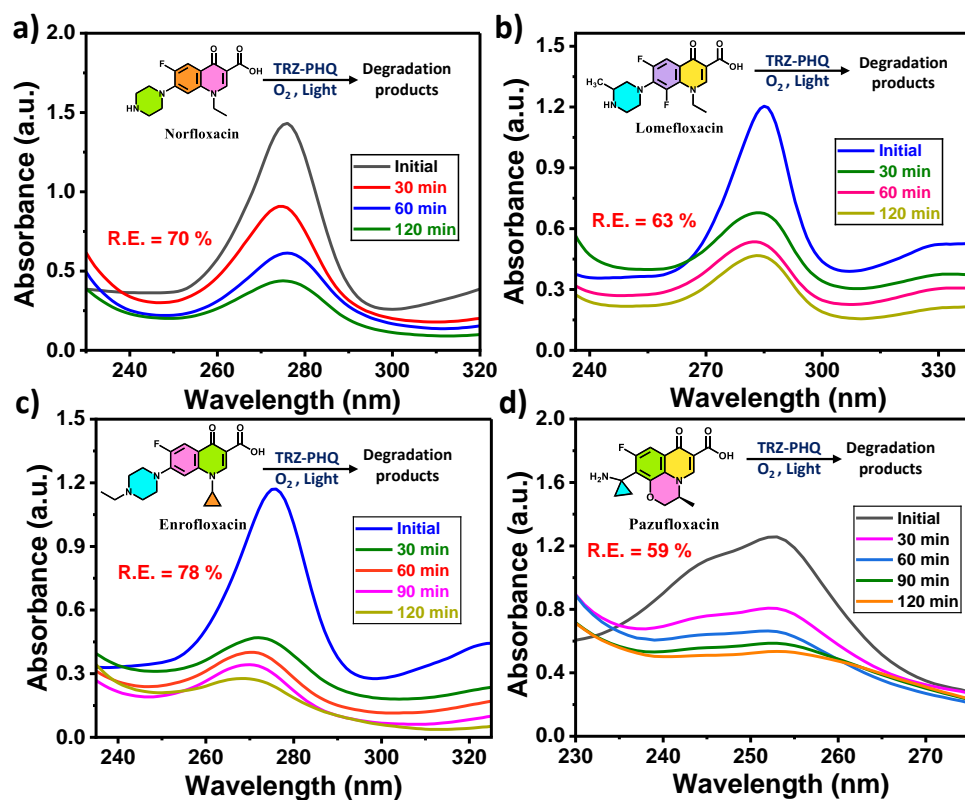

**Figure S12.** UV-visible spectra of a) Norfloxacin, b) Lomefloxacin, c) Enrofloxacin, and d) Pazufloxacin over time in the presence of the photocatalyst **TRZ-PHQ**.

**Table S3.** Recovery rate of polymer catalyst, **TRZ-PHQ**, for photocatalytic Tetracycline (TC) degradation.

| Cycle number | Catalyst recovery (%) |
|--------------|-----------------------|
| Run 1        | 100                   |
| Run 2        | 99                    |
| Run 3        | 97                    |
| Run 4        | 95                    |
| Run 5        | 92                    |
| Run 6        | 91                    |
| Run 7        | 88                    |

## References

1. K. Akatsuka, G. Takanashi, Y. Ebina, M.-a. Haga and T. Sasaki, *J. Phys. Chem. C*, 2012, **116**, 12426-12433.
2. W. Zhou, J. Jia, J. Lu, L. Yang, D. Hou, G. Li and S. Chen, *Nano Energy*, 2016, **28**, 29-43.
3. H. Xu, X. Li, H. Hao, X. Dong, W. Sheng and X. Lang, *Appl. Catal. B: Environ.*, 2021, **285**, 119796.
4. S. Sau, F. Banerjee and S. K. Samanta, *ACS Appl. Nano Mater.*, 2023, **6**, 11679-11688.
5. J. Bi, Z. Zhang, J. Tian and G. Huang, *J. Colloid Interface Sci.*, 2024, **661**, 761-771.
6. Z. Deng, Q. Liu, P. Sun, H. Zhao, X. Cao, S. Xiong, D. Zhang, H. Zhai and W. Zhang, *Sep. Purif. Technol.*, 2025, **357**, 130123.
7. Z. Hu, Y. Luo, L. Wang, Y. Wang, Q. Wang, G. Jiang, Q. Zhang and F. Cui, *ACS Appl. Polym. Mater.*, 2023, **5**, 9263-9273.
8. Y. Qin, Z. Jiang, Y. Guo, M. A. Mushtaq, Z. Shen, W. Du, C. Ni, G. Luo, Y. Ji, Z. Zhang, Y. Deng, A. Hussain, L. N. U. Rehman, X. Cai, P. Tsiakaras and J. Zhao, *Chem. Eng. J.*, 2023, **460**, 141810.
9. S. Shang, S. Li, C. Peng, H. Liu and J. Hu, *Journal of Materials Chemistry C*, 2023, **11**, 7397-7404.
10. Q. Rong, Q. Cheng, X. Guo, X. He and S. He, *Microporous Mesoporous Mater.*, 2022, **335**, 111816.
11. Z. Xie, Y. Feng, F. Wang, D. Chen, Q. Zhang, Y. Zeng, W. Lv and G. Liu, *Appl. Catal. B: Environ.*, 2018, **229**, 96-104.
12. G. Wu, P. Li, D. Xu, B. Luo, Y. Hong, W. Shi and C. Liu, *Applied Surface Science*, 2015, **333**, 39-47.
13. Q.-M. Hasi, J. Yu, Y. Guo, S. Hu, S. Jiang, C. Xiao, A. Li and L. Chen, *J. Colloid Interface Sci.*, 2025, **679**, 811-823.
14. G. Wu, G. Li, Y. Tang, G. Tai, Y. Pan, J. Han and W. Xing, *Langmuir*, 2024, **40**, 25657-25669.
15. Q. Zhang, L. Jiang, J. Wang, Y. Zhu, Y. Pu and W. Dai, *Appl. Catal. B: Environ.*, 2020, **277**, 119122.
16. Z. Deng, W. Zhang, P. Sun, H. Zhao, X. Cao, G. Li, S. Xiong and Q. Liu, *Chemosphere*, 2024, **364**, 143236.
17. X. Li, J. Xiong, X. Gao, J. Ma, Z. Chen, B. Kang, J. Liu, H. Li, Z. Feng and J. Huang, *J. Hazard. Mater.*, 2020, **387**, 121690.
18. Y. Tong, S. Huang, X. Zhao, Y. Yang, L. Feng, Q. Han and L. Zhang, *Chem. Eng. J.*, 2024, **480**, 147693.
